# Supplementary material for: Targeting low-normal or high-normal mean arterial pressure after cardiac arrest and resuscitation: a randomised pilot trial
Source: PubMed Central journal article supplement — Intensive Care Med. 2018 Nov 15;44(12):2091–101. doi: 10.1007/s00134-018-5446-8 (PMC6280836; doi:10.1007/s00134-018-5446-8), 2018-11-15
Supplement: 134_2018_5446_MOESM1_ESM.pdf [file 134_2018_5446_MOESM1_ESM.pdf]

# Targeting low-normal or high-normal mean arterial pressure after cardiac arrest and resuscitation: a randomised pilot trial

Intensive Care Medicine

## AUTHORS

Pekka Jakkula, MD, Department of Anaesthesiology, Intensive Care and Pain Medicine, University of Helsinki and Helsinki University Hospital, Helsinki, Finland, [pekka.jakkula@hus.fi](mailto:pekka.jakkula@hus.fi), +358 400 552370 (corresponding author)

Ville Pettilä, MD, PhD, Professor, Department of Anaesthesiology, Intensive Care and Pain Medicine, University of Helsinki and Helsinki University Hospital, Helsinki, Finland

Markus B Skrifvars, MD, PhD, Professor, Department of Anaesthesiology, Intensive Care and Pain Medicine and Department of Emergency Medicine and Services, University of Helsinki and Helsinki University Hospital, Helsinki, Finland

Johanna Hästbacka, MD, PhD, Department of Anaesthesiology, Intensive Care and Pain Medicine, University of Helsinki and Helsinki University Hospital, Helsinki, Finland

Pekka Loisa, MD, PhD, Department of Intensive Care, Päijät-Häme Central Hospital, Lahti, Finland

Marjaana Tiainen, MD, PhD, Department of Neurology, University of Helsinki and Helsinki University Hospital, Helsinki, Finland

Erika Wilkman, MD, PhD, Department of Anaesthesiology, Intensive Care and Pain Medicine, University of Helsinki and Helsinki University Hospital, Helsinki, Finland

Jussi Toppila, MD, PhD, HUS Medical Imaging Center, Clinical Neurophysiology, University of Helsinki, Helsinki University Hospital and University of Helsinki, Finland

Talvikki Koskue, MD, Department of Anaesthesiology, Intensive Care and Pain Medicine, University of Helsinki and Helsinki University Hospital, Helsinki, Finland

Stepani Bendel, MD, PhD, Department of Intensive Care, Kuopio University Hospital, Kuopio, Finland

Thomas Birkelund, MD, Aarhus University Hospital, Aarhus, Denmark

Raili Laru-Sompa, MD, Department of Intensive Care, Central Finland Central Hospital, Jyväskylä, Finland

Miia Valkonen, MD, PhD, Department of Anaesthesiology, Intensive Care and Pain Medicine, Helsinki University Hospital, Helsinki, Finland

Matti Reinikainen, MD, PhD, Associate Professor, Department of Intensive Care, North Karelia Central Hospital, Joensuu, Finland

COMACARE study group

**Table 4. Results (p values) of the interaction analyses<sup>1</sup>**

|                                                    |                         | <b>PaCO<sub>2</sub></b> | <b>PaO<sub>2</sub></b> | <b>MAP</b> | <b>TTM target</b> |
|----------------------------------------------------|-------------------------|-------------------------|------------------------|------------|-------------------|
| NSE at 48 h                                        | <b>PaCO<sub>2</sub></b> | –                       | 0.378                  | 0.300      | 0.959             |
|                                                    | <b>PaO<sub>2</sub></b>  | 0.378                   | –                      | 0.098      | 0.139             |
|                                                    | <b>MAP</b>              | 0.300                   | 0.098                  | –          | 0.244             |
|                                                    | <b>TTM target</b>       | 0.959                   | 0.139                  | 0.244      | –                 |
| Good neurological outcome<br>(CPC 1-2) at 6 months | <b>PaCO<sub>2</sub></b> | –                       | 0.421                  | 0.858      | 0.737             |
|                                                    | <b>PaO<sub>2</sub></b>  | 0.421                   | –                      | 0.467      | 0.126             |
|                                                    | <b>MAP</b>              | 0.858                   | 0.467                  | –          | 0.213             |
|                                                    | <b>TTM target</b>       | 0.737                   | 0.126                  | 0.213      | –                 |

<sup>1</sup> The interaction effects of PaCO<sub>2</sub>, PaO<sub>2</sub>, MAP and TTM targets on the NSE results at 48 h was assessed with the univariate analysis of variance. The interaction effects of PaCO<sub>2</sub>, PaO<sub>2</sub>, MAP and TTM targets on the CPC results at 6 months was analysed with a binary logistic regression model.

Abbreviations: PaCO<sub>2</sub>, arterial carbon dioxide tension; PaO<sub>2</sub>, arterial oxygen tension; MAP, mean arterial pressure; TTM, targeted temperature management; NSE, neuron-specific enolase and CPC, Cerebral Performance Category.

**Table 5. Causes of death during the 6 month follow-up**

|              | <b>Low-normal MAP<br/>group</b> | <b>High-normal MAP<br/>group</b> |
|--------------|---------------------------------|----------------------------------|
| <b>HIE</b>   | 19                              | 16                               |
| <b>Other</b> | 1                               | 3                                |
| <b>Total</b> | 20                              | 19                               |

Abbreviations: HIE, hypoxic ischaemic encephalopathy and MAP, mean arterial pressure.
